# Supplementary material for: Microbial Diversity Indexes Can Explain Soil Carbon Dynamics as a Function of Carbon Source
Source: PLoS One. 2016 Aug 23;11(8):e0161251. doi: 10.1371/journal.pone.0161251 (PMC4995005; doi:10.1371/journal.pone.0161251)
Supplement: S2 Table — AMT, Average Monthly Temperature; AMP, Average Monthly Precipitation; AMETP, Average Monthly Evapotranspiration; SOC, Soil Organic Carbon; C/N, soil Carbon/Nitrogen ratio; H', Shannon index; J', Evenness; 1/D, inverse Simpson index; Rs, Respiration rate during control (Rs,control) and amended (Rs,amended) soils mineralisation; Rr, Respiration rate during residue mineralisation. Coordinates (longitude and latitude) follow the Lambert-93 projection. (XLSX) [file pone.0161251.s003.xlsx]

## Sheet: Dataser
Location					Landuse		Soil Texture (mg/g soil)			Climate			Soil nutrients		pH	Microbial biomass	Bacterial diversity indexes				Fungal diversity indexes				Soil respiration rate (mg C-CO2/g soil/day)
Sampling ID	Sampling year	Longitude	Latitude	Elevation (m)	Landuse class	Landuse description	Clay	Silt	Sand	AMT (°C)	AMP (mm)	AMETP (mm)	SOC (mg/g soil)	C/N	pH	Molecular biomass (µg DNA /g soil)	Bacterial richness (Number of OTU)	Bacterial H'	Bacterial J'	Bacterial 1/D	Fungal richness (Number of OTU)	Fungal H'	Fungal J'	Fungal 1/D	Time (Days)	Rscontrol	Rsamended	Rr
16	2003	604083	7069637	134	Grassland	Grassland > 10 years	345	346	309	15.2	51	95.5	32.598	10.0116707616708	6.2	59.4111082850259	557	3.766	0.595697	11.044	244	2.043	0.371668	2.353	3	0.00870096697804297	0.017098219626622	0.0785856316161085
16	2003	604083	7069637	134	Grassland	Grassland > 10 years	345	346	309	15.2	51	95.5	32.598	10.0116707616708	6.2	59.4111082850259	557	3.766	0.595697	11.044	244	2.043	0.371668	2.353	7	0.00656073715412078	0.0103392189965427	0.0483377068567315
16	2003	604083	7069637	134	Grassland	Grassland > 10 years	345	346	309	15.2	51	95.5	32.598	10.0116707616708	6.2	59.4111082850259	557	3.766	0.595697	11.044	244	2.043	0.371668	2.353	14	0.00611226772105729	0.00788984478625551	0.0157729366196595
16	2003	604083	7069637	134	Grassland	Grassland > 10 years	345	346	309	15.2	51	95.5	32.598	10.0116707616708	6.2	59.4111082850259	557	3.766	0.595697	11.044	244	2.043	0.371668	2.353	21	0.00490916112308585	0.00641766914520293	0.0060649157142756
16	2003	604083	7069637	134	Grassland	Grassland > 10 years	345	346	309	15.2	51	95.5	32.598	10.0116707616708	6.2	59.4111082850259	557	3.766	0.595697	11.044	244	2.043	0.371668	2.353	28	0.00428217619938765	0.00601807005704167	0.00369325277053608
16	2003	604083	7069637	134	Grassland	Grassland > 10 years	345	346	309	15.2	51	95.5	32.598	10.0116707616708	6.2	59.4111082850259	557	3.766	0.595697	11.044	244	2.043	0.371668	2.353	44	0.00385656306902597	0.00438396805480216	0.00165094007188607
16	2003	604083	7069637	134	Grassland	Grassland > 10 years	345	346	309	15.2	51	95.5	32.598	10.0116707616708	6.2	59.4111082850259	557	3.766	0.595697	11.044	244	2.043	0.371668	2.353	60	0.0052171107639951	0.00631527569310696	0.00160675586059196
16	2003	604083	7069637	134	Grassland	Grassland > 10 years	345	346	309	15.2	51	95.5	32.598	10.0116707616708	6.2	59.4111082850259	557	3.766	0.595697	11.044	244	2.043	0.371668	2.353	80	0.00566071326031813	0.00671192856245427	0.00140941175527018
16	2003	604083	7069637	134	Grassland	Grassland > 10 years	345	346	309	15.2	51	95.5	32.598	10.0116707616708	6.2	59.4111082850259	557	3.766	0.595697	11.044	244	2.043	0.371668	2.353	104	0.00505759663089642	0.00546119765868969	0.00100343696418779
164	2003	714946	6940768	45	Grassland	Grassland > 10 years	212	126	662	15.2	53.9	70	19.8	9.85074626865672	7.41	59.1762870023062	697	4.887	0.746453	36.902	336	3.396	0.583819	7.484	3	0.00466868121828074	0.0111446453142455	0.0514008054943642
164	2003	714946	6940768	45	Grassland	Grassland > 10 years	212	126	662	15.2	53.9	70	19.8	9.85074626865672	7.41	59.1762870023062	697	4.887	0.746453	36.902	336	3.396	0.583819	7.484	7	0.00333815196961278	0.0059034041293276	0.0383726019161478
164	2003	714946	6940768	45	Grassland	Grassland > 10 years	212	126	662	15.2	53.9	70	19.8	9.85074626865672	7.41	59.1762870023062	697	4.887	0.746453	36.902	336	3.396	0.583819	7.484	14	0.00292507109991694	0.0038341980749826	0.0222287919732636
164	2003	714946	6940768	45	Grassland	Grassland > 10 years	212	126	662	15.2	53.9	70	19.8	9.85074626865672	7.41	59.1762870023062	697	4.887	0.746453	36.902	336	3.396	0.583819	7.484	21	0.00247653633557064	0.00303308550491771	0.00987574139485199
164	2003	714946	6940768	45	Grassland	Grassland > 10 years	212	126	662	15.2	53.9	70	19.8	9.85074626865672	7.41	59.1762870023062	697	4.887	0.746453	36.902	336	3.396	0.583819	7.484	28	0.00193306150595125	0.00305405004056121	0.0043839298393145
164	2003	714946	6940768	45	Grassland	Grassland > 10 years	212	126	662	15.2	53.9	70	19.8	9.85074626865672	7.41	59.1762870023062	697	4.887	0.746453	36.902	336	3.396	0.583819	7.484	44	0.00149001428023742	0.00159456020606998	0.00216482486116604
164	2003	714946	6940768	45	Grassland	Grassland > 10 years	212	126	662	15.2	53.9	70	19.8	9.85074626865672	7.41	59.1762870023062	697	4.887	0.746453	36.902	336	3.396	0.583819	7.484	60	0.00189278029933179	0.00309285644534437	0.00267883160253006
164	2003	714946	6940768	45	Grassland	Grassland > 10 years	212	126	662	15.2	53.9	70	19.8	9.85074626865672	7.41	59.1762870023062	697	4.887	0.746453	36.902	336	3.396	0.583819	7.484	80	0.00189478492219294	0.0023797859224248	0.00141237766226016
164	2003	714946	6940768	45	Grassland	Grassland > 10 years	212	126	662	15.2	53.9	70	19.8	9.85074626865672	7.41	59.1762870023062	697	4.887	0.746453	36.902	336	3.396	0.583819	7.484	104	0.00199631352895391	0.00226677743935342	0.00108650367290097
563	2005	537991	6814326	176	Cropland	Cropland + temporary grassland	336	488	176	11.9	79.6	40.3	18.9	9.45	6.9	43.4466957940458	739	5.115	0.774306	57.646	353	3.61	0.615411	15.317	3	0.00610281806750379	0.011339069887628	0.0594456743069274
563	2005	537991	6814326	176	Cropland	Cropland + temporary grassland	336	488	176	11.9	79.6	40.3	18.9	9.45	6.9	43.4466957940458	739	5.115	0.774306	57.646	353	3.61	0.615411	15.317	7	0.00445667882583219	0.00725743202484463	0.0370652848684762
563	2005	537991	6814326	176	Cropland	Cropland + temporary grassland	336	488	176	11.9	79.6	40.3	18.9	9.45	6.9	43.4466957940458	739	5.115	0.774306	57.646	353	3.61	0.615411	15.317	14	0.00414646128995094	0.00582760677103034	0.0198220606932616
563	2005	537991	6814326	176	Cropland	Cropland + temporary grassland	336	488	176	11.9	79.6	40.3	18.9	9.45	6.9	43.4466957940458	739	5.115	0.774306	57.646	353	3.61	0.615411	15.317	21	0.00347774292468092	0.00554075773024097	0.00920674966855589
563	2005	537991	6814326	176	Cropland	Cropland + temporary grassland	336	488	176	11.9	79.6	40.3	18.9	9.45	6.9	43.4466957940458	739	5.115	0.774306	57.646	353	3.61	0.615411	15.317	28	0.00294588355499299	0.00430781043790229	0.00475139161636705
563	2005	537991	6814326	176	Cropland	Cropland + temporary grassland	336	488	176	11.9	79.6	40.3	18.9	9.45	6.9	43.4466957940458	739	5.115	0.774306	57.646	353	3.61	0.615411	15.317	44	0.00286639446781874	0.00295772673883928	0.00229894478469212
563	2005	537991	6814326	176	Cropland	Cropland + temporary grassland	336	488	176	11.9	79.6	40.3	18.9	9.45	6.9	43.4466957940458	739	5.115	0.774306	57.646	353	3.61	0.615411	15.317	60	0.00226295069559239	0.00255954882160797	0.00168409798855002
563	2005	537991	6814326	176	Cropland	Cropland + temporary grassland	336	488	176	11.9	79.6	40.3	18.9	9.45	6.9	43.4466957940458	739	5.115	0.774306	57.646	353	3.61	0.615411	15.317	80	0.001954450769935	0.00271273612246101	0.00151974825707738
563	2005	537991	6814326	176	Cropland	Cropland + temporary grassland	336	488	176	11.9	79.6	40.3	18.9	9.45	6.9	43.4466957940458	739	5.115	0.774306	57.646	353	3.61	0.615411	15.317	104	0.00161570469214285	0.00207258597935819	0.000852367490097552
732	2006	457653	6767023	55	Grassland	Grassland > 10 years	447	389	164	10.2	68.4	68.6	41	9.19282511210762	6.4	93.717332719918	611	4.429	0.690353	27.801	314	2.918	0.507601	5.56	3	0.0155502341884823	0.0220017760723987	0.0603761441259252
732	2006	457653	6767023	55	Grassland	Grassland > 10 years	447	389	164	10.2	68.4	68.6	41	9.19282511210762	6.4	93.717332719918	611	4.429	0.690353	27.801	314	2.918	0.507601	5.56	7	0.0115682281018976	0.0152885517461336	0.0558214530503986
732	2006	457653	6767023	55	Grassland	Grassland > 10 years	447	389	164	10.2	68.4	68.6	41	9.19282511210762	6.4	93.717332719918	611	4.429	0.690353	27.801	314	2.918	0.507601	5.56	14	0.0094885102871345	0.0105542926231047	0.0160312718102789
732	2006	457653	6767023	55	Grassland	Grassland > 10 years	447	389	164	10.2	68.4	68.6	41	9.19282511210762	6.4	93.717332719918	611	4.429	0.690353	27.801	314	2.918	0.507601	5.56	21	0.00735062657453227	0.00833506575760487	0.00922382227545038
732	2006	457653	6767023	55	Grassland	Grassland > 10 years	447	389	164	10.2	68.4	68.6	41	9.19282511210762	6.4	93.717332719918	611	4.429	0.690353	27.801	314	2.918	0.507601	5.56	28	0.00788973369409818	0.00943126476966686	0.00724180163392392
732	2006	457653	6767023	55	Grassland	Grassland > 10 years	447	389	164	10.2	68.4	68.6	41	9.19282511210762	6.4	93.717332719918	611	4.429	0.690353	27.801	314	2.918	0.507601	5.56	44	0.00539231597266822	0.00673005064112456	0.00324627347497077
732	2006	457653	6767023	55	Grassland	Grassland > 10 years	447	389	164	10.2	68.4	68.6	41	9.19282511210762	6.4	93.717332719918	611	4.429	0.690353	27.801	314	2.918	0.507601	5.56	60	0.00519439001272525	0.00580268389834163	0.00186164606938252
732	2006	457653	6767023	55	Grassland	Grassland > 10 years	447	389	164	10.2	68.4	68.6	41	9.19282511210762	6.4	93.717332719918	611	4.429	0.690353	27.801	314	2.918	0.507601	5.56	80	0.00371452000508272	0.00366305223882164	0.000906835520309241
732	2006	457653	6767023	55	Grassland	Grassland > 10 years	447	389	164	10.2	68.4	68.6	41	9.19282511210762	6.4	93.717332719918	611	4.429	0.690353	27.801	314	2.918	0.507601	5.56	104	0.00370783528964301	0.00418101013099895	0.000814130438579989
885	2003	361332	6719848	47	Cropland	Cropland + temporary grassland	218	531	251	8.9	49.4	48.7	20.567	9.95980629539952	5.42	10.5717624053717	394	4.012	0.671231	23.38	289	3.08	0.54363	8.122	3	0.00571956824286621	0.0111931543307244	0.0802867411021181
885	2003	361332	6719848	47	Cropland	Cropland + temporary grassland	218	531	251	8.9	49.4	48.7	20.567	9.95980629539952	5.42	10.5717624053717	394	4.012	0.671231	23.38	289	3.08	0.54363	8.122	7	0.00453268540396904	0.00805574759438954	0.0454983544033948
885	2003	361332	6719848	47	Cropland	Cropland + temporary grassland	218	531	251	8.9	49.4	48.7	20.567	9.95980629539952	5.42	10.5717624053717	394	4.012	0.671231	23.38	289	3.08	0.54363	8.122	14	0.00435527991540403	0.00618598750336166	0.0198929224491843
885	2003	361332	6719848	47	Cropland	Cropland + temporary grassland	218	531	251	8.9	49.4	48.7	20.567	9.95980629539952	5.42	10.5717624053717	394	4.012	0.671231	23.38	289	3.08	0.54363	8.122	21	0.00409783233582321	0.00430046358566598	0.00714318389201726
885	2003	361332	6719848	47	Cropland	Cropland + temporary grassland	218	531	251	8.9	49.4	48.7	20.567	9.95980629539952	5.42	10.5717624053717	394	4.012	0.671231	23.38	289	3.08	0.54363	8.122	28	0.0033737291356839	0.00359036928179489	0.00386518613900702
885	2003	361332	6719848	47	Cropland	Cropland + temporary grassland	218	531	251	8.9	49.4	48.7	20.567	9.95980629539952	5.42	10.5717624053717	394	4.012	0.671231	23.38	289	3.08	0.54363	8.122	44	0.00257311426651038	0.0028777300110456	0.00206539246857531
885	2003	361332	6719848	47	Cropland	Cropland + temporary grassland	218	531	251	8.9	49.4	48.7	20.567	9.95980629539952	5.42	10.5717624053717	394	4.012	0.671231	23.38	289	3.08	0.54363	8.122	60	0.00238902116511214	0.00281508462582959	0.00139876464741107
885	2003	361332	6719848	47	Cropland	Cropland + temporary grassland	218	531	251	8.9	49.4	48.7	20.567	9.95980629539952	5.42	10.5717624053717	394	4.012	0.671231	23.38	289	3.08	0.54363	8.122	80	0.00231320565905636	0.00247902140684988	0.000938156290958774
885	2003	361332	6719848	47	Cropland	Cropland + temporary grassland	218	531	251	8.9	49.4	48.7	20.567	9.95980629539952	5.42	10.5717624053717	394	4.012	0.671231	23.38	289	3.08	0.54363	8.122	104	0.00185044809820904	0.00206541445859607	0.000634628423779395
1184	2003	824147	6620055	381	Grassland	Grassland > 10 years	463	215	322	7.5	48.1	58.5	41.957	10.2785399314062	8.09	75.0020950568218	900	5.169	0.759891	51.56	221	3.293	0.609941	11.803	3	0.00772901835036128	0.0190787804942772	0.0397737811613717
1184	2003	824147	6620055	381	Grassland	Grassland > 10 years	463	215	322	7.5	48.1	58.5	41.957	10.2785399314062	8.09	75.0020950568218	900	5.169	0.759891	51.56	221	3.293	0.609941	11.803	7	0.00546632099563539	0.011622605161719	0.0336234595901166
1184	2003	824147	6620055	381	Grassland	Grassland > 10 years	463	215	322	7.5	48.1	58.5	41.957	10.2785399314062	8.09	75.0020950568218	900	5.169	0.759891	51.56	221	3.293	0.609941	11.803	14	0.00471149457163551	0.00730152588597883	0.0154751545562178
1184	2003	824147	6620055	381	Grassland	Grassland > 10 years	463	215	322	7.5	48.1	58.5	41.957	10.2785399314062	8.09	75.0020950568218	900	5.169	0.759891	51.56	221	3.293	0.609941	11.803	21	0.00447234081755586	0.00574991337776137	0.00743349240303391
1184	2003	824147	6620055	381	Grassland	Grassland > 10 years	463	215	322	7.5	48.1	58.5	41.957	10.2785399314062	8.09	75.0020950568218	900	5.169	0.759891	51.56	221	3.293	0.609941	11.803	28	0.00369811506385401	0.00455381906696961	0.00412098197893129
1184	2003	824147	6620055	381	Grassland	Grassland > 10 years	463	215	322	7.5	48.1	58.5	41.957	10.2785399314062	8.09	75.0020950568218	900	5.169	0.759891	51.56	221	3.293	0.609941	11.803	44	0.00292665481803738	0.00350170101919002	0.00753315429124416
1184	2003	824147	6620055	381	Grassland	Grassland > 10 years	463	215	322	7.5	48.1	58.5	41.957	10.2785399314062	8.09	75.0020950568218	900	5.169	0.759891	51.56	221	3.293	0.609941	11.803	60	0.00144895619022941	0.00275998780972449	0.00855152837823441
1184	2003	824147	6620055	381	Grassland	Grassland > 10 years	463	215	322	7.5	48.1	58.5	41.957	10.2785399314062	8.09	75.0020950568218	900	5.169	0.759891	51.56	221	3.293	0.609941	11.803	80	0.00193769054192033	0.00249851176893828	0.00547332638583054
1184	2003	824147	6620055	381	Grassland	Grassland > 10 years	463	215	322	7.5	48.1	58.5	41.957	10.2785399314062	8.09	75.0020950568218	900	5.169	0.759891	51.56	221	3.293	0.609941	11.803	104	0.00107030620350006	0.00168249171135016	0.00216266830804847
1253	2004	616059	6589839	397	Cropland	Cropland + temporary grassland	279	309	412	19.6	75.2	116.4	21.2	10.547263681592	5.2	58.7143441691293	582	4.274	0.671267	21.543	207	1.87	0.350579	2.144	3	0.0108448589396855	0.0173904770698422	0.0927906686946232
1253	2004	616059	6589839	397	Cropland	Cropland + temporary grassland	279	309	412	19.6	75.2	116.4	21.2	10.547263681592	5.2	58.7143441691293	582	4.274	0.671267	21.543	207	1.87	0.350579	2.144	7	0.0077971223681532	0.0112302274111493	0.0483586165934599
1253	2004	616059	6589839	397	Cropland	Cropland + temporary grassland	279	309	412	19.6	75.2	116.4	21.2	10.547263681592	5.2	58.7143441691293	582	4.274	0.671267	21.543	207	1.87	0.350579	2.144	14	0.00599234328269751	0.00820907760859268	0.0225785948838297
1253	2004	616059	6589839	397	Cropland	Cropland + temporary grassland	279	309	412	19.6	75.2	116.4	21.2	10.547263681592	5.2	58.7143441691293	582	4.274	0.671267	21.543	207	1.87	0.350579	2.144	21	0.00500364550913646	0.00607953023013778	0.00878101760983941
1253	2004	616059	6589839	397	Cropland	Cropland + temporary grassland	279	309	412	19.6	75.2	116.4	21.2	10.547263681592	5.2	58.7143441691293	582	4.274	0.671267	21.543	207	1.87	0.350579	2.144	28	0.00538760491694112	0.00666441062080617	0.00593661895012925
1253	2004	616059	6589839	397	Cropland	Cropland + temporary grassland	279	309	412	19.6	75.2	116.4	21.2	10.547263681592	5.2	58.7143441691293	582	4.274	0.671267	21.543	207	1.87	0.350579	2.144	44	0.00372129216276391	0.00475405260700139	0.00270712404144211
1253	2004	616059	6589839	397	Cropland	Cropland + temporary grassland	279	309	412	19.6	75.2	116.4	21.2	10.547263681592	5.2	58.7143441691293	582	4.274	0.671267	21.543	207	1.87	0.350579	2.144	60	0.00379304268597926	0.00429490061606965	0.00175942117255333
1253	2004	616059	6589839	397	Cropland	Cropland + temporary grassland	279	309	412	19.6	75.2	116.4	21.2	10.547263681592	5.2	58.7143441691293	582	4.274	0.671267	21.543	207	1.87	0.350579	2.144	80	0.00265974254046602	0.00281932807092134	0.000949686298698337
1253	2004	616059	6589839	397	Cropland	Cropland + temporary grassland	279	309	412	19.6	75.2	116.4	21.2	10.547263681592	5.2	58.7143441691293	582	4.274	0.671267	21.543	207	1.87	0.350579	2.144	104	0.0027801368340765	0.00345442051437869	0.000947475068303668
1376	2006	583687	6542149	384	Cropland	Cropland + temporary grassland	161	331	508	4.7	136.8	14.7	29.5	12.882096069869	5.5	94.9144191678921	711	4.613	0.702432	28.74	437	3.642	0.599081	9.289	3	0.00530516260758575	0.00996129565755941	0.0786453832728165
1376	2006	583687	6542149	384	Cropland	Cropland + temporary grassland	161	331	508	4.7	136.8	14.7	29.5	12.882096069869	5.5	94.9144191678921	711	4.613	0.702432	28.74	437	3.642	0.599081	9.289	7	0.00407532617833413	0.00632117742660323	0.0480718837982092
1376	2006	583687	6542149	384	Cropland	Cropland + temporary grassland	161	331	508	4.7	136.8	14.7	29.5	12.882096069869	5.5	94.9144191678921	711	4.613	0.702432	28.74	437	3.642	0.599081	9.289	14	0.00329513654306801	0.00476962413736449	0.0199197985350234
1376	2006	583687	6542149	384	Cropland	Cropland + temporary grassland	161	331	508	4.7	136.8	14.7	29.5	12.882096069869	5.5	94.9144191678921	711	4.613	0.702432	28.74	437	3.642	0.599081	9.289	21	0.00262324560165811	0.00360545240427654	0.00854388041779448
1376	2006	583687	6542149	384	Cropland	Cropland + temporary grassland	161	331	508	4.7	136.8	14.7	29.5	12.882096069869	5.5	94.9144191678921	711	4.613	0.702432	28.74	437	3.642	0.599081	9.289	28	0.00293949226368383	0.0039718032113514	0.00575997009306653
1376	2006	583687	6542149	384	Cropland	Cropland + temporary grassland	161	331	508	4.7	136.8	14.7	29.5	12.882096069869	5.5	94.9144191678921	711	4.613	0.702432	28.74	437	3.642	0.599081	9.289	44	0.00201870239191441	0.00289430118027793	0.00253035613482006
1376	2006	583687	6542149	384	Cropland	Cropland + temporary grassland	161	331	508	4.7	136.8	14.7	29.5	12.882096069869	5.5	94.9144191678921	711	4.613	0.702432	28.74	437	3.642	0.599081	9.289	60	0.00204914564018133	0.0026104917662742	0.00163301942421351
1376	2006	583687	6542149	384	Cropland	Cropland + temporary grassland	161	331	508	4.7	136.8	14.7	29.5	12.882096069869	5.5	94.9144191678921	711	4.613	0.702432	28.74	437	3.642	0.599081	9.289	80	0.00143867487420018	0.00167203245424445	0.000870969162468431
1376	2006	583687	6542149	384	Cropland	Cropland + temporary grassland	161	331	508	4.7	136.8	14.7	29.5	12.882096069869	5.5	94.9144191678921	711	4.613	0.702432	28.74	437	3.642	0.599081	9.289	104	0.0015222799205538	0.00218441581850895	0.00113292323130219
1388	2006	775510	6540535	439	Grassland	Grassland > 10 years	167	259	574	4.7	51.4	20.3	19.2	11.0982658959538	5.6	46.8321553905166	875	4.923	0.726778	37.056	292	2.951	0.519808	5.534	3	0.00693731689019343	0.0115465988501194	0.0872180745590366
1388	2006	775510	6540535	439	Grassland	Grassland > 10 years	167	259	574	4.7	51.4	20.3	19.2	11.0982658959538	5.6	46.8321553905166	875	4.923	0.726778	37.056	292	2.951	0.519808	5.534	7	0.00535015829291988	0.00752586849847419	0.0357719510286196
1388	2006	775510	6540535	439	Grassland	Grassland > 10 years	167	259	574	4.7	51.4	20.3	19.2	11.0982658959538	5.6	46.8321553905166	875	4.923	0.726778	37.056	292	2.951	0.519808	5.534	14	0.00461051907598053	0.00591846354228425	0.0163426482250861
1388	2006	775510	6540535	439	Grassland	Grassland > 10 years	167	259	574	4.7	51.4	20.3	19.2	11.0982658959538	5.6	46.8321553905166	875	4.923	0.726778	37.056	292	2.951	0.519808	5.534	21	0.00361305530103012	0.00436742380691698	0.00681538385567205
1388	2006	775510	6540535	439	Grassland	Grassland > 10 years	167	259	574	4.7	51.4	20.3	19.2	11.0982658959538	5.6	46.8321553905166	875	4.923	0.726778	37.056	292	2.951	0.519808	5.534	28	0.00429143492453846	0.00478186002486576	0.00496671617790758
1388	2006	775510	6540535	439	Grassland	Grassland > 10 years	167	259	574	4.7	51.4	20.3	19.2	11.0982658959538	5.6	46.8321553905166	875	4.923	0.726778	37.056	292	2.951	0.519808	5.534	44	0.00282948914805269	0.0034334602702263	0.00244933475883767
1388	2006	775510	6540535	439	Grassland	Grassland > 10 years	167	259	574	4.7	51.4	20.3	19.2	11.0982658959538	5.6	46.8321553905166	875	4.923	0.726778	37.056	292	2.951	0.519808	5.534	60	0.00296809751459787	0.00346715827541567	0.00200826138923536
1388	2006	775510	6540535	439	Grassland	Grassland > 10 years	167	259	574	4.7	51.4	20.3	19.2	11.0982658959538	5.6	46.8321553905166	875	4.923	0.726778	37.056	292	2.951	0.519808	5.534	80	0.00216054383344459	0.00243509744705511	0.00129144058961496
1388	2006	775510	6540535	439	Grassland	Grassland > 10 years	167	259	574	4.7	51.4	20.3	19.2	11.0982658959538	5.6	46.8321553905166	875	4.923	0.726778	37.056	292	2.951	0.519808	5.534	104	0.00222825631292321	0.0027340262986167	0.00125194637104016
1409	2007	455674	6527225	83	Cropland	Cropland	559	387	54	17.2	70.6	85.9	23.9	9.59839357429719	8.1	53.0728086504294	722	5.053	0.767663	55.219	297	3.359	0.589928	9.467	3	0.00562626073506342	0.0151096371789756	0.0261523854908694
1409	2007	455674	6527225	83	Cropland	Cropland	559	387	54	17.2	70.6	85.9	23.9	9.59839357429719	8.1	53.0728086504294	722	5.053	0.767663	55.219	297	3.359	0.589928	9.467	7	0.00321742836118082	0.00845409143656121	0.0235900014598331
1409	2007	455674	6527225	83	Cropland	Cropland	559	387	54	17.2	70.6	85.9	23.9	9.59839357429719	8.1	53.0728086504294	722	5.053	0.767663	55.219	297	3.359	0.589928	9.467	14	0.00281692248676637	0.00570872770225275	0.018786307909963
1409	2007	455674	6527225	83	Cropland	Cropland	559	387	54	17.2	70.6	85.9	23.9	9.59839357429719	8.1	53.0728086504294	722	5.053	0.767663	55.219	297	3.359	0.589928	9.467	21	0.00260413601858943	0.00477827207095394	0.012354531230112
1409	2007	455674	6527225	83	Cropland	Cropland	559	387	54	17.2	70.6	85.9	23.9	9.59839357429719	8.1	53.0728086504294	722	5.053	0.767663	55.219	297	3.359	0.589928	9.467	28	0.00272184585797362	0.0036616831680448	0.00713585943850274
1409	2007	455674	6527225	83	Cropland	Cropland	559	387	54	17.2	70.6	85.9	23.9	9.59839357429719	8.1	53.0728086504294	722	5.053	0.767663	55.219	297	3.359	0.589928	9.467	44	0.00203470413561421	0.00249961521328059	0.00325128384579194
1409	2007	455674	6527225	83	Cropland	Cropland	559	387	54	17.2	70.6	85.9	23.9	9.59839357429719	8.1	53.0728086504294	722	5.053	0.767663	55.219	297	3.359	0.589928	9.467	60	0.00176220342141172	0.00311621346093886	0.00312778181508119
1409	2007	455674	6527225	83	Cropland	Cropland	559	387	54	17.2	70.6	85.9	23.9	9.59839357429719	8.1	53.0728086504294	722	5.053	0.767663	55.219	297	3.359	0.589928	9.467	80	0.00225521752897944	0.00288624752416284	0.00225019973312504
1409	2007	455674	6527225	83	Cropland	Cropland	559	387	54	17.2	70.6	85.9	23.9	9.59839357429719	8.1	53.0728086504294	722	5.053	0.767663	55.219	297	3.359	0.589928	9.467	104	0.00211329492315292	0.00261779213777419	0.00159412803388167
1412	2006	503629	6526829	137	Cropland	Fallow	291	427	282	16.2	83.4	77.4	18.2	11.2345679012346	6	22.5182596661189	545	4.646	0.737327	35.484	263	2.635	0.472937	4.159	3	0.0073365152541286	0.0117252026198009	0.0754261725773278
1412	2006	503629	6526829	137	Cropland	Fallow	291	427	282	16.2	83.4	77.4	18.2	11.2345679012346	6	22.5182596661189	545	4.646	0.737327	35.484	263	2.635	0.472937	4.159	7	0.00542692805281364	0.00746911608735486	0.0524169176332367
1412	2006	503629	6526829	137	Cropland	Fallow	291	427	282	16.2	83.4	77.4	18.2	11.2345679012346	6	22.5182596661189	545	4.646	0.737327	35.484	263	2.635	0.472937	4.159	14	0.00437173217270789	0.00548031812354319	0.021099880647763
1412	2006	503629	6526829	137	Cropland	Fallow	291	427	282	16.2	83.4	77.4	18.2	11.2345679012346	6	22.5182596661189	545	4.646	0.737327	35.484	263	2.635	0.472937	4.159	21	0.00347188928945708	0.00407496189185666	0.00918283347551633
1412	2006	503629	6526829	137	Cropland	Fallow	291	427	282	16.2	83.4	77.4	18.2	11.2345679012346	6	22.5182596661189	545	4.646	0.737327	35.484	263	2.635	0.472937	4.159	28	0.00389002131656347	0.00452622694682606	0.00716139946121446
1412	2006	503629	6526829	137	Cropland	Fallow	291	427	282	16.2	83.4	77.4	18.2	11.2345679012346	6	22.5182596661189	545	4.646	0.737327	35.484	263	2.635	0.472937	4.159	44	0.00252489600280704	0.00325555222557336	0.00313223878776943
1412	2006	503629	6526829	137	Cropland	Fallow	291	427	282	16.2	83.4	77.4	18.2	11.2345679012346	6	22.5182596661189	545	4.646	0.737327	35.484	263	2.635	0.472937	4.159	60	0.0026413346494979	0.00283531628077987	0.00173021260032665
1412	2006	503629	6526829	137	Cropland	Fallow	291	427	282	16.2	83.4	77.4	18.2	11.2345679012346	6	22.5182596661189	545	4.646	0.737327	35.484	263	2.635	0.472937	4.159	80	0.0018525312304939	0.00175570410616069	0.000860101525807045
1412	2006	503629	6526829	137	Cropland	Fallow	291	427	282	16.2	83.4	77.4	18.2	11.2345679012346	6	22.5182596661189	545	4.646	0.737327	35.484	263	2.635	0.472937	4.159	104	0.00200291114267101	0.00212833017924986	0.000989472178958884
1426	2004	727419	6524956	320	Cropland	Cropland	647	262	91	14.7	78.4	107.5	18.4	9.10891089108911	8.22	29.1650556428226	725	5.285	0.802474	80.343	277	3.078	0.547338	8.993	3	0.00345183823546328	0.0102938538694807	0.0335847167013131
1426	2004	727419	6524956	320	Cropland	Cropland	647	262	91	14.7	78.4	107.5	18.4	9.10891089108911	8.22	29.1650556428226	725	5.285	0.802474	80.343	277	3.078	0.547338	8.993	7	0.00232181121409446	0.00583126120014939	0.0361056421345064
1426	2004	727419	6524956	320	Cropland	Cropland	647	262	91	14.7	78.4	107.5	18.4	9.10891089108911	8.22	29.1650556428226	725	5.285	0.802474	80.343	277	3.078	0.547338	8.993	14	0.00185083905959443	0.00347742106994253	0.0175567539238968
1426	2004	727419	6524956	320	Cropland	Cropland	647	262	91	14.7	78.4	107.5	18.4	9.10891089108911	8.22	29.1650556428226	725	5.285	0.802474	80.343	277	3.078	0.547338	8.993	21	0.00169363126453472	0.00275088025926046	0.00852620443097508
1426	2004	727419	6524956	320	Cropland	Cropland	647	262	91	14.7	78.4	107.5	18.4	9.10891089108911	8.22	29.1650556428226	725	5.285	0.802474	80.343	277	3.078	0.547338	8.993	28	0.0015540798276937	0.0021703996970026	0.00470933225583833
1426	2004	727419	6524956	320	Cropland	Cropland	647	262	91	14.7	78.4	107.5	18.4	9.10891089108911	8.22	29.1650556428226	725	5.285	0.802474	80.343	277	3.078	0.547338	8.993	44	0.00072328968306579	0.00132407470311948	0.0018601230618971
1426	2004	727419	6524956	320	Cropland	Cropland	647	262	91	14.7	78.4	107.5	18.4	9.10891089108911	8.22	29.1650556428226	725	5.285	0.802474	80.343	277	3.078	0.547338	8.993	60	0.00134665767406814	0.00175080196953361	0.00165879208980643
1426	2004	727419	6524956	320	Cropland	Cropland	647	262	91	14.7	78.4	107.5	18.4	9.10891089108911	8.22	29.1650556428226	725	5.285	0.802474	80.343	277	3.078	0.547338	8.993	80	0.00132491856965964	0.00148698493053149	0.00108597238438239
1426	2004	727419	6524956	320	Cropland	Cropland	647	262	91	14.7	78.4	107.5	18.4	9.10891089108911	8.22	29.1650556428226	725	5.285	0.802474	80.343	277	3.078	0.547338	8.993	104	0.0010498491795356	0.0013246691478791	0.000780748101950002
1437	2007	903254	6523458	390	Cropland	Cropland + temporary grassland	134	282	584	16.3	141.7	77.9	17.9	12.6950354609929	7.1	109.66511547444	804	5.329	0.796547	82.312	253	3.322	0.600399	9.378	3	0.00712982109302782	0.012757000596355	0.0574505580782784
1437	2007	903254	6523458	390	Cropland	Cropland + temporary grassland	134	282	584	16.3	141.7	77.9	17.9	12.6950354609929	7.1	109.66511547444	804	5.329	0.796547	82.312	253	3.322	0.600399	9.378	7	0.00566395069654187	0.00876841037485632	0.0472088980431286
1437	2007	903254	6523458	390	Cropland	Cropland + temporary grassland	134	282	584	16.3	141.7	77.9	17.9	12.6950354609929	7.1	109.66511547444	804	5.329	0.796547	82.312	253	3.322	0.600399	9.378	14	0.00450496002959903	0.00604345221407144	0.0203140091180549
1437	2007	903254	6523458	390	Cropland	Cropland + temporary grassland	134	282	584	16.3	141.7	77.9	17.9	12.6950354609929	7.1	109.66511547444	804	5.329	0.796547	82.312	253	3.322	0.600399	9.378	21	0.00388467415777587	0.00451999569549634	0.00892153033827674
1437	2007	903254	6523458	390	Cropland	Cropland + temporary grassland	134	282	584	16.3	141.7	77.9	17.9	12.6950354609929	7.1	109.66511547444	804	5.329	0.796547	82.312	253	3.322	0.600399	9.378	28	0.00476545287627866	0.00524529109225602	0.00639957826165082
1437	2007	903254	6523458	390	Cropland	Cropland + temporary grassland	134	282	584	16.3	141.7	77.9	17.9	12.6950354609929	7.1	109.66511547444	804	5.329	0.796547	82.312	253	3.322	0.600399	9.378	44	0.00360478516499521	0.00416971642119543	0.00294986668189438
1437	2007	903254	6523458	390	Cropland	Cropland + temporary grassland	134	282	584	16.3	141.7	77.9	17.9	12.6950354609929	7.1	109.66511547444	804	5.329	0.796547	82.312	253	3.322	0.600399	9.378	60	0.00416479550799502	0.00414610388026158	0.00184589823324385
1437	2007	903254	6523458	390	Cropland	Cropland + temporary grassland	134	282	584	16.3	141.7	77.9	17.9	12.6950354609929	7.1	109.66511547444	804	5.329	0.796547	82.312	253	3.322	0.600399	9.378	80	0.00296328145550414	0.00279765381623042	0.000973362222250156
1437	2007	903254	6523458	390	Cropland	Cropland + temporary grassland	134	282	584	16.3	141.7	77.9	17.9	12.6950354609929	7.1	109.66511547444	804	5.329	0.796547	82.312	253	3.322	0.600399	9.378	104	0.0027320602374778	0.00332206791132243	0.000974782172285171
1589	2005	694910	6461288	1140	Grassland	Grassland > 10 years	192	444	364	13.6	78	103.2	80.7	15.1691729323308	5.7	26.2575209756942	559	3.908	0.617787	12.308	248	2.673	0.484789	4.884	3	0.0176779672476692	0.023896086250837	0.0658676875236862
1589	2005	694910	6461288	1140	Grassland	Grassland > 10 years	192	444	364	13.6	78	103.2	80.7	15.1691729323308	5.7	26.2575209756942	559	3.908	0.617787	12.308	248	2.673	0.484789	4.884	7	0.0138962441429708	0.0170409176757457	0.0358559579574841
1589	2005	694910	6461288	1140	Grassland	Grassland > 10 years	192	444	364	13.6	78	103.2	80.7	15.1691729323308	5.7	26.2575209756942	559	3.908	0.617787	12.308	248	2.673	0.484789	4.884	14	0.0113670492737935	0.0129766068656559	0.0191727618303662
1589	2005	694910	6461288	1140	Grassland	Grassland > 10 years	192	444	364	13.6	78	103.2	80.7	15.1691729323308	5.7	26.2575209756942	559	3.908	0.617787	12.308	248	2.673	0.484789	4.884	21	0.00918064591014954	0.00972872581779634	0.00887557348064216
1589	2005	694910	6461288	1140	Grassland	Grassland > 10 years	192	444	364	13.6	78	103.2	80.7	15.1691729323308	5.7	26.2575209756942	559	3.908	0.617787	12.308	248	2.673	0.484789	4.884	28	0.0105233502635132	0.0112567411616706	0.00676256747391207
1589	2005	694910	6461288	1140	Grassland	Grassland > 10 years	192	444	364	13.6	78	103.2	80.7	15.1691729323308	5.7	26.2575209756942	559	3.908	0.617787	12.308	248	2.673	0.484789	4.884	44	0.00715562904082943	0.00809041027589052	0.00278474095815129
1589	2005	694910	6461288	1140	Grassland	Grassland > 10 years	192	444	364	13.6	78	103.2	80.7	15.1691729323308	5.7	26.2575209756942	559	3.908	0.617787	12.308	248	2.673	0.484789	4.884	60	0.00759287898130423	0.00771158262207341	0.00159117973590636
1589	2005	694910	6461288	1140	Grassland	Grassland > 10 years	192	444	364	13.6	78	103.2	80.7	15.1691729323308	5.7	26.2575209756942	559	3.908	0.617787	12.308	248	2.673	0.484789	4.884	80	0.00566572784781521	0.0054874810397373	0.000808714454686731
1589	2005	694910	6461288	1140	Grassland	Grassland > 10 years	192	444	364	13.6	78	103.2	80.7	15.1691729323308	5.7	26.2575209756942	559	3.908	0.617787	12.308	248	2.673	0.484789	4.884	104	0.0059216834975134	0.00629754165357039	0.000687142544422659
1714	2007	710490	6413201	997	Grassland	Grassland > 10 years	267	252	481	10.7	78.6	86.3	81.5	11.676217765043	4.5	59.6210728494992	472	4.246	0.689587	24.109	304	3.007	0.525938	6.274	3	0.0206713423690631	0.0280627968860096	0.0546058042177306
1714	2007	710490	6413201	997	Grassland	Grassland > 10 years	267	252	481	10.7	78.6	86.3	81.5	11.676217765043	4.5	59.6210728494992	472	4.246	0.689587	24.109	304	3.007	0.525938	6.274	7	0.0205837612665798	0.0261384941830669	0.023115210846177
1714	2007	710490	6413201	997	Grassland	Grassland > 10 years	267	252	481	10.7	78.6	86.3	81.5	11.676217765043	4.5	59.6210728494992	472	4.246	0.689587	24.109	304	3.007	0.525938	6.274	14	0.0137844298568515	0.0155836044521592	0.0112390743895877
1714	2007	710490	6413201	997	Grassland	Grassland > 10 years	267	252	481	10.7	78.6	86.3	81.5	11.676217765043	4.5	59.6210728494992	472	4.246	0.689587	24.109	304	3.007	0.525938	6.274	21	0.0139485485709255	0.0153376862922938	0.0116261246150216
1714	2007	710490	6413201	997	Grassland	Grassland > 10 years	267	252	481	10.7	78.6	86.3	81.5	11.676217765043	4.5	59.6210728494992	472	4.246	0.689587	24.109	304	3.007	0.525938	6.274	28	0.0132053178761731	0.0142738769663103	0.00909276162819129
1714	2007	710490	6413201	997	Grassland	Grassland > 10 years	267	252	481	10.7	78.6	86.3	81.5	11.676217765043	4.5	59.6210728494992	472	4.246	0.689587	24.109	304	3.007	0.525938	6.274	44	0.00960139540636609	0.00999298676746778	0.00512783602025954
1714	2007	710490	6413201	997	Grassland	Grassland > 10 years	267	252	481	10.7	78.6	86.3	81.5	11.676217765043	4.5	59.6210728494992	472	4.246	0.689587	24.109	304	3.007	0.525938	6.274	60	0.00862157536202681	0.00869489855382067	0.0036500464589264
1714	2007	710490	6413201	997	Grassland	Grassland > 10 years	267	252	481	10.7	78.6	86.3	81.5	11.676217765043	4.5	59.6210728494992	472	4.246	0.689587	24.109	304	3.007	0.525938	6.274	80	0.00768553264466678	0.00783875874715575	0.0023825748453535
1714	2007	710490	6413201	997	Grassland	Grassland > 10 years	267	252	481	10.7	78.6	86.3	81.5	11.676217765043	4.5	59.6210728494992	472	4.246	0.689587	24.109	304	3.007	0.525938	6.274	104	0.0070571587559736	0.00143433618705956	0.000314291783439214
1763	2008	806256	6396405	445	Grassland	Grassland > 10 years	113	230	657	17.4	171.5	98.3	15.6	10.7586206896552	5.3	15.8573741253944	672	4.715	0.724176	28.109	392	3.43	0.574411	8.464	3	0.00618845480653541	0.0112509561434647	0.0808966320322557
1763	2008	806256	6396405	445	Grassland	Grassland > 10 years	113	230	657	17.4	171.5	98.3	15.6	10.7586206896552	5.3	15.8573741253944	672	4.715	0.724176	28.109	392	3.43	0.574411	8.464	7	0.00542211815990993	0.00867471268614054	0.043045503784867
1763	2008	806256	6396405	445	Grassland	Grassland > 10 years	113	230	657	17.4	171.5	98.3	15.6	10.7586206896552	5.3	15.8573741253944	672	4.715	0.724176	28.109	392	3.43	0.574411	8.464	14	0.00366856180600054	0.00509571326702135	0.0152650149782337
1763	2008	806256	6396405	445	Grassland	Grassland > 10 years	113	230	657	17.4	171.5	98.3	15.6	10.7586206896552	5.3	15.8573741253944	672	4.715	0.724176	28.109	392	3.43	0.574411	8.464	21	0.00364615847365514	0.00528982110585545	0.00992757770709821
1763	2008	806256	6396405	445	Grassland	Grassland > 10 years	113	230	657	17.4	171.5	98.3	15.6	10.7586206896552	5.3	15.8573741253944	672	4.715	0.724176	28.109	392	3.43	0.574411	8.464	28	0.00314678475097634	0.00474621364124028	0.00664504899802436
1763	2008	806256	6396405	445	Grassland	Grassland > 10 years	113	230	657	17.4	171.5	98.3	15.6	10.7586206896552	5.3	15.8573741253944	672	4.715	0.724176	28.109	392	3.43	0.574411	8.464	44	0.0022406317577656	0.00290716452913913	0.00331932950011325
1763	2008	806256	6396405	445	Grassland	Grassland > 10 years	113	230	657	17.4	171.5	98.3	15.6	10.7586206896552	5.3	15.8573741253944	672	4.715	0.724176	28.109	392	3.43	0.574411	8.464	60	0.00184339975989925	0.00237616157447436	0.00248248781881514
1763	2008	806256	6396405	445	Grassland	Grassland > 10 years	113	230	657	17.4	171.5	98.3	15.6	10.7586206896552	5.3	15.8573741253944	672	4.715	0.724176	28.109	392	3.43	0.574411	8.464	80	0.00171395558810462	0.00235530285263607	0.00214324739976601
1763	2008	806256	6396405	445	Grassland	Grassland > 10 years	113	230	657	17.4	171.5	98.3	15.6	10.7586206896552	5.3	15.8573741253944	672	4.715	0.724176	28.109	392	3.43	0.574411	8.464	104	0.00179316797262727	0.0034202426365456	0.00258663583013182
1829	2006	518288	6366856	102	Grassland	Grassland > 10 years	356	313	331	7	76.3	16.7	18.2	9.83783783783784	8.2	71.7120592673892	674	5.018	0.770393	52.242	327	3.522	0.608255	13.601	3	0.0065655188005527	0.0111349608317994	0.0334036588933058
1829	2006	518288	6366856	102	Grassland	Grassland > 10 years	356	313	331	7	76.3	16.7	18.2	9.83783783783784	8.2	71.7120592673892	674	5.018	0.770393	52.242	327	3.522	0.608255	13.601	7	0.00507632386784033	0.00889962385255895	0.0490071845037336
1829	2006	518288	6366856	102	Grassland	Grassland > 10 years	356	313	331	7	76.3	16.7	18.2	9.83783783783784	8.2	71.7120592673892	674	5.018	0.770393	52.242	327	3.522	0.608255	13.601	14	0.00332210715580282	0.00465245474701947	0.0208738435699563
1829	2006	518288	6366856	102	Grassland	Grassland > 10 years	356	313	331	7	76.3	16.7	18.2	9.83783783783784	8.2	71.7120592673892	674	5.018	0.770393	52.242	327	3.522	0.608255	13.601	21	0.00331742176025273	0.0042494620655852	0.00960136387468133
1829	2006	518288	6366856	102	Grassland	Grassland > 10 years	356	313	331	7	76.3	16.7	18.2	9.83783783783784	8.2	71.7120592673892	674	5.018	0.770393	52.242	327	3.522	0.608255	13.601	28	0.00291018285341723	0.00387523873240327	0.00564913529571923
1829	2006	518288	6366856	102	Grassland	Grassland > 10 years	356	313	331	7	76.3	16.7	18.2	9.83783783783784	8.2	71.7120592673892	674	5.018	0.770393	52.242	327	3.522	0.608255	13.601	44	0.00197606769814745	0.00248678213964121	0.00214724404154655
1829	2006	518288	6366856	102	Grassland	Grassland > 10 years	356	313	331	7	76.3	16.7	18.2	9.83783783783784	8.2	71.7120592673892	674	5.018	0.770393	52.242	327	3.522	0.608255	13.601	60	0.00194311162985624	0.00221160202824571	0.00140348404539772
1829	2006	518288	6366856	102	Grassland	Grassland > 10 years	356	313	331	7	76.3	16.7	18.2	9.83783783783784	8.2	71.7120592673892	674	5.018	0.770393	52.242	327	3.522	0.608255	13.601	80	0.00177501459233711	0.00221748532038049	0.00110987556894828
1829	2006	518288	6366856	102	Grassland	Grassland > 10 years	356	313	331	7	76.3	16.7	18.2	9.83783783783784	8.2	71.7120592673892	674	5.018	0.770393	52.242	327	3.522	0.608255	13.601	104	0.00166439936554717	0.00227650973122911	0.000910781479185266
1977	2007	709681	6317302	850	Cropland	Cropland + temporary grassland	202	535	263	11.7	112.8	47.4	58.2	13.4101382488479	7.9	22.5792100963435	881	5.292	0.78047	71.828	281	3.419	0.606365	10.26	3	0.00546580858472394	0.0179723365859103	0.0245623826769316
1977	2007	709681	6317302	850	Cropland	Cropland + temporary grassland	202	535	263	11.7	112.8	47.4	58.2	13.4101382488479	7.9	22.5792100963435	881	5.292	0.78047	71.828	281	3.419	0.606365	10.26	7	0.00382995380199214	0.0124025365314614	0.0340246104812323
1977	2007	709681	6317302	850	Cropland	Cropland + temporary grassland	202	535	263	11.7	112.8	47.4	58.2	13.4101382488479	7.9	22.5792100963435	881	5.292	0.78047	71.828	281	3.419	0.606365	10.26	14	0.00251583766844835	0.00536258632395162	0.0136183539103162
1977	2007	709681	6317302	850	Cropland	Cropland + temporary grassland	202	535	263	11.7	112.8	47.4	58.2	13.4101382488479	7.9	22.5792100963435	881	5.292	0.78047	71.828	281	3.419	0.606365	10.26	21	0.00261528498129727	0.0040492171946731	0.00873422591337494
1977	2007	709681	6317302	850	Cropland	Cropland + temporary grassland	202	535	263	11.7	112.8	47.4	58.2	13.4101382488479	7.9	22.5792100963435	881	5.292	0.78047	71.828	281	3.419	0.606365	10.26	28	0.00242476125918579	0.00347863539426459	0.00599095738259192
1977	2007	709681	6317302	850	Cropland	Cropland + temporary grassland	202	535	263	11.7	112.8	47.4	58.2	13.4101382488479	7.9	22.5792100963435	881	5.292	0.78047	71.828	281	3.419	0.606365	10.26	44	0.00138311957564551	0.00191364088537531	0.00228277490818839
1977	2007	709681	6317302	850	Cropland	Cropland + temporary grassland	202	535	263	11.7	112.8	47.4	58.2	13.4101382488479	7.9	22.5792100963435	881	5.292	0.78047	71.828	281	3.419	0.606365	10.26	60	0.00152046192734893	0.00169960549207217	0.00152658940517659
1977	2007	709681	6317302	850	Cropland	Cropland + temporary grassland	202	535	263	11.7	112.8	47.4	58.2	13.4101382488479	7.9	22.5792100963435	881	5.292	0.78047	71.828	281	3.419	0.606365	10.26	80	0.0015525174291855	0.00159341101485777	0.00111123880910217
1977	2007	709681	6317302	850	Cropland	Cropland + temporary grassland	202	535	263	11.7	112.8	47.4	58.2	13.4101382488479	7.9	22.5792100963435	881	5.292	0.78047	71.828	281	3.419	0.606365	10.26	104	0.00161308182195873	0.00281105150528246	0.00152660866173653
2114	2008	693295	6269490	475	Grassland	Grassland > 10 years	252	378	370	19.5	39.5	161.7	24.7	9.39163498098859	5.8	33.9042941418576	902	4.991	0.733407	30.767	249	3.317	0.601183	11.664	3	0.00869499811425515	0.0151235970717831	0.0656428036496834
2114	2008	693295	6269490	475	Grassland	Grassland > 10 years	252	378	370	19.5	39.5	161.7	24.7	9.39163498098859	5.8	33.9042941418576	902	4.991	0.733407	30.767	249	3.317	0.601183	11.664	7	0.00699375449524493	0.0121862339598144	0.0482371301122288
2114	2008	693295	6269490	475	Grassland	Grassland > 10 years	252	378	370	19.5	39.5	161.7	24.7	9.39163498098859	5.8	33.9042941418576	902	4.991	0.733407	30.767	249	3.317	0.601183	11.664	14	0.00460216802258694	0.00682155433304701	0.0165989906971527
2114	2008	693295	6269490	475	Grassland	Grassland > 10 years	252	378	370	19.5	39.5	161.7	24.7	9.39163498098859	5.8	33.9042941418576	902	4.991	0.733407	30.767	249	3.317	0.601183	11.664	21	0.00469159743854039	0.00691034978965231	0.00951453167919413
2114	2008	693295	6269490	475	Grassland	Grassland > 10 years	252	378	370	19.5	39.5	161.7	24.7	9.39163498098859	5.8	33.9042941418576	902	4.991	0.733407	30.767	249	3.317	0.601183	11.664	28	0.00423476283900686	0.00599494238502891	0.00570433844634866
2114	2008	693295	6269490	475	Grassland	Grassland > 10 years	252	378	370	19.5	39.5	161.7	24.7	9.39163498098859	5.8	33.9042941418576	902	4.991	0.733407	30.767	249	3.317	0.601183	11.664	44	0.00314800090877042	0.00440739479871553	0.00323341906566099
2114	2008	693295	6269490	475	Grassland	Grassland > 10 years	252	378	370	19.5	39.5	161.7	24.7	9.39163498098859	5.8	33.9042941418576	902	4.991	0.733407	30.767	249	3.317	0.601183	11.664	60	0.00287416765937815	0.0037770362344622	0.00219933806233241
2114	2008	693295	6269490	475	Grassland	Grassland > 10 years	252	378	370	19.5	39.5	161.7	24.7	9.39163498098859	5.8	33.9042941418576	902	4.991	0.733407	30.767	249	3.317	0.601183	11.664	80	0.00265509679195561	0.00356829431603087	0.00174413130257779
2114	2008	693295	6269490	475	Grassland	Grassland > 10 years	252	378	370	19.5	39.5	161.7	24.7	9.39163498098859	5.8	33.9042941418576	902	4.991	0.733407	30.767	249	3.317	0.601183	11.664	104	0.00257175815314069	0.00233267767117563	0.000975467756089238
2230	2008	644947	6221948	244	Cropland	Fallow	256	321	423	7.2	68.2	37.6	8.56	9.83908045977012	8.5	89.8377813139351	827	5.501	0.818934	99.211	270	3.082	0.550434	8.053	3	0.00381570075759093	0.00964206189385935	0.043230500459966
2230	2008	644947	6221948	244	Cropland	Fallow	256	321	423	7.2	68.2	37.6	8.56	9.83908045977012	8.5	89.8377813139351	827	5.501	0.818934	99.211	270	3.082	0.550434	8.053	7	0.00310636382301416	0.0056190714165526	0.0247921841112305
2230	2008	644947	6221948	244	Cropland	Fallow	256	321	423	7.2	68.2	37.6	8.56	9.83908045977012	8.5	89.8377813139351	827	5.501	0.818934	99.211	270	3.082	0.550434	8.053	14	0.00225433888087755	0.00286269299982031	0.00838304210640367
2230	2008	644947	6221948	244	Cropland	Fallow	256	321	423	7.2	68.2	37.6	8.56	9.83908045977012	8.5	89.8377813139351	827	5.501	0.818934	99.211	270	3.082	0.550434	8.053	21	0.00242181512751016	0.00298862802943706	0.00690257902857163
2230	2008	644947	6221948	244	Cropland	Fallow	256	321	423	7.2	68.2	37.6	8.56	9.83908045977012	8.5	89.8377813139351	827	5.501	0.818934	99.211	270	3.082	0.550434	8.053	28	0.00227330167089824	0.00303664338167384	0.00641325385189176
2230	2008	644947	6221948	244	Cropland	Fallow	256	321	423	7.2	68.2	37.6	8.56	9.83908045977012	8.5	89.8377813139351	827	5.501	0.818934	99.211	270	3.082	0.550434	8.053	44	0.00165335035020153	0.00204561391460892	0.00422891998977668
2230	2008	644947	6221948	244	Cropland	Fallow	256	321	423	7.2	68.2	37.6	8.56	9.83908045977012	8.5	89.8377813139351	827	5.501	0.818934	99.211	270	3.082	0.550434	8.053	60	0.00167547619797748	0.00189756170967829	0.00364862916974603
2230	2008	644947	6221948	244	Cropland	Fallow	256	321	423	7.2	68.2	37.6	8.56	9.83908045977012	8.5	89.8377813139351	827	5.501	0.818934	99.211	270	3.082	0.550434	8.053	80	0.00161506697989123	0.00203965732790909	0.00348198067520459
2230	2008	644947	6221948	244	Cropland	Fallow	256	321	423	7.2	68.2	37.6	8.56	9.83908045977012	8.5	89.8377813139351	827	5.501	0.818934	99.211	270	3.082	0.550434	8.053	104	0.00160331474421302	0.00466113551726795	0.00682801070544833

## Sheet: Metadata
Elevation	Lambert 93
AMT	Average Monthly Temperature
AMP	Average Monthly Precipitation
AMETP	Average Monthly Evapotranspiration
SOC	Soil Organic Carbon
C/N	ratio of total carbon and total nitrogen content
OTU	Operational Taxonomic Unit
H'	Shannon index
J'	Evenness
1/D	Inverse Simpson index
Rscontrol	Non-labelled respired carbon in control soils (SOC mineralisation)
Rscontrol	Non-labelled respired carbon in amended soils (SOC mineralisation)
Rr	Labelled respired carbon in amended soils (Wheat residue mineralisation)
